# Supplementary material
Source: PubMed Central journal article supplement (PMC3057344)
Supplement: NIHMS262960-supplement-01.pdf [file NIHMS262960-supplement-01.pdf]

## Supplementary Material and Methods (Makino et al.)

### DNA primers sequences used for TIR library construction

#### Light chain library

TIR-LF1 : 5'-P- CT AGT ATG AAR TCN CTN CTN CCN ACN GCN GCN GCA GG  
TIR-LF2 : 5'-P- CT AGT ATG AAR TCN CTN TTR CCN ACN GCA GCC GCA GG  
TIR-LF3 : 5'-P- CT AGT ATG AAR TCN TTR TTR CCN ACN GCA GCC GCA GG  
TIR-LF4 : 5'-P- CT AGT ATG AAR TCN TTR CTN CCN ACN GCA GCC GCA GG  
TIR-LF5 : 5'-P- CT AGT ATG AAR AGY TTR TTR CCN ACN GCA GCC GCA GG  
TIR-LF6 : 5'-P- CT AGT ATG AAR AGY TTR CTN CCN ACN GCA GCC GCA GG  
TIR-LF7 : 5'-P- CT AGT ATG AAR AGY CTN CTN CCN ACN GCA GCC GCA GG  
TIR-LF8 : 5'-P- CT AGT ATG AAR AGY CTN TTR CCN ACN GCA GCC GCA GG  
TIR-LR1: 5'-P- CC TGC NGC NGC NGT NGG NAG NAG NGA YTT CAT A  
TIR-LR2: 5'-P- CC TGC GGC TGC NGT NGG YAA NAG NGA YTT CAT A  
TIR-LR3: 5'-P- CC TGC GGC TGC NGT NGG YAA YAA NGA YTT CAT A  
TIR-LR4: 5'-P- CC TGC GGC TGC NGT NGG NAG YAA NGA YTT CAT A  
TIR-LR5: 5'-P- CC TGC GGC TGC NGT NGG YAA YAA RCT YTT CAT A  
TIR-LR6: 5'-P- CC TGC GGC TGC NGT NGG NAG YAA RCT YTT CAT A  
TIR-LR7: 5'-P- CC TGC GGC TGC NGT NGG NAG NAG RCT YTT CAT A  
TIR-LR8: 5'-P- CC TGC GGC TGC NGT NGG YAA NAG RCT YTT CAT A

#### Heavy chain library

TIR-HF1:5'- P-T ATG AAR TCN CTN CTN CCN ACN GCN GCN GCT GGA TTG TTA TTG  
TIR-HF2:5'- P-T ATG AAR AGY TTR TTR CCN ACN GCA GCC GCT GGA TTG TTA TTG  
TIR-HF3:5'- P-T ATG AAR AGY TTR CTN CCN ACN GCA GCC GCT GGA TTG TTA TTG  
TIR-HF4:5'- P-T ATG AAR AGY CTN TTR CCN ACN GCA GCC GCT GGA TTG TTA TTG  
TIR-HF5:5'- P-T ATG AAR AGY CTN CTN CCN ACN GCA GCC GCT GGA TTG TTA TTG  
TIR-HF6:5'- P-T ATG AAR TCN TTR TTR CCN ACN GCA GCC GCT GGA TTG TTA TTG  
TIR-HF7:5'- P-T ATG AAR TCN TTR CTN CCN ACN GCA GCC GCT GGA TTG TTA TTG  
TIR-HF8:5'- P-T ATG AAR TCN CTN TTR CCN ACN GCA GCC GCT GGA TTG TTA TTG  
TIR-HR1:5'- P- C TAG CAA TAA CAA TCC AGC NGC NGC NGT NGG NAG NAG NGA YTT  
CA  
TIR-HR2:5'- P- C TAG CAA TAA CAA TCC AGC GGC TGC NGT NGG YAA YAA RCT YTT CA  
TIR-HR3:5'- P- C TAG CAA TAA CAA TCC AGC GGC TGC NGT NGG NAG YAA RCT YTT CA  
TIR-HR4:5'- P- C TAG CAA TAA CAA TCC AGC GGC TGC NGT NGG YAA NAG RCT YTT CA  
TIR-HR5:5'- P- C TAG CAA TAA CAA TCC AGC GGC TGC NGT NGG NAG NAG RCT YTT CA  
TIR-HR6:5'- P- C TAG CAA TAA CAA TCC AGC GGC TGC NGT NGG YAA YAA NGA YTT  
CA  
TIR-HR7:5'- P- C TAG CAA TAA CAA TCC AGC GGC TGC NGT NGG NAG YAA NGA YTT  
CA

TIR-HR8:5' - P- C TAG CAA TAA CAA TCC AGC GGC TGC NGT NGG YAA NAG NGA YTT  
CA

P : phosphorylation, N: A,T,G,C, Y: C,T, R : A,G
